# Supplementary material for: Multi-functional rare-earth hybrid layered networks: photoluminescence and catalysis studies
Source: Royal Society of Chemistry journal article supplement (doi:10.1039/b817381h), 2009-01-01
Supplement: b817381hc.pdf [file b817381hc.pdf]

## 4. Photoluminescence

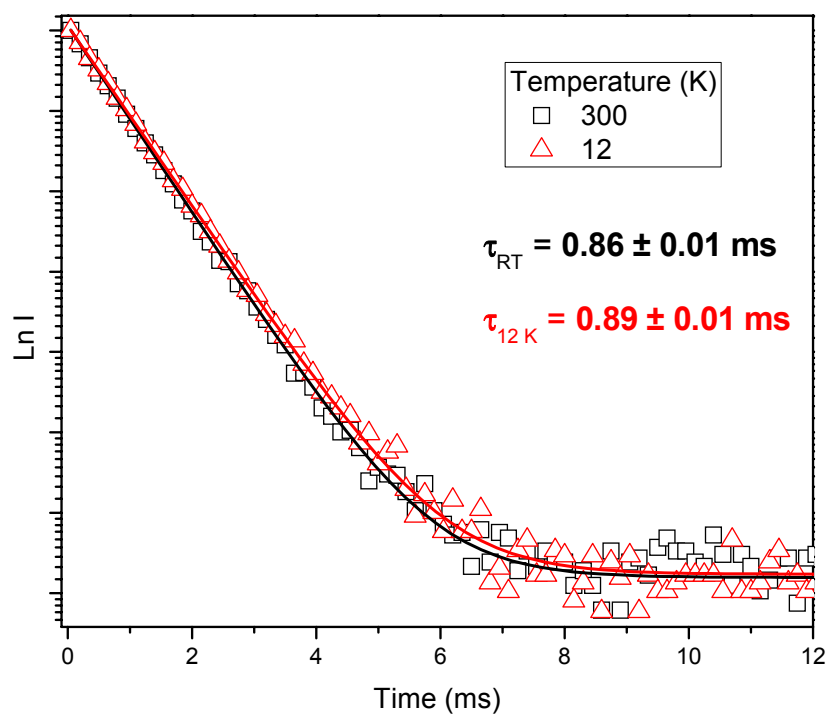

**Figure S24** -  $^5D_0$  decay curves of  $[\text{Eu}(\text{H}_2\text{cmp})(\text{H}_2\text{O})]$  (**6**) recorded at room-temperature (**black**) and 12 K (**red**). The emission was monitored at 616.5 nm and the excitation was performed at 393 nm.

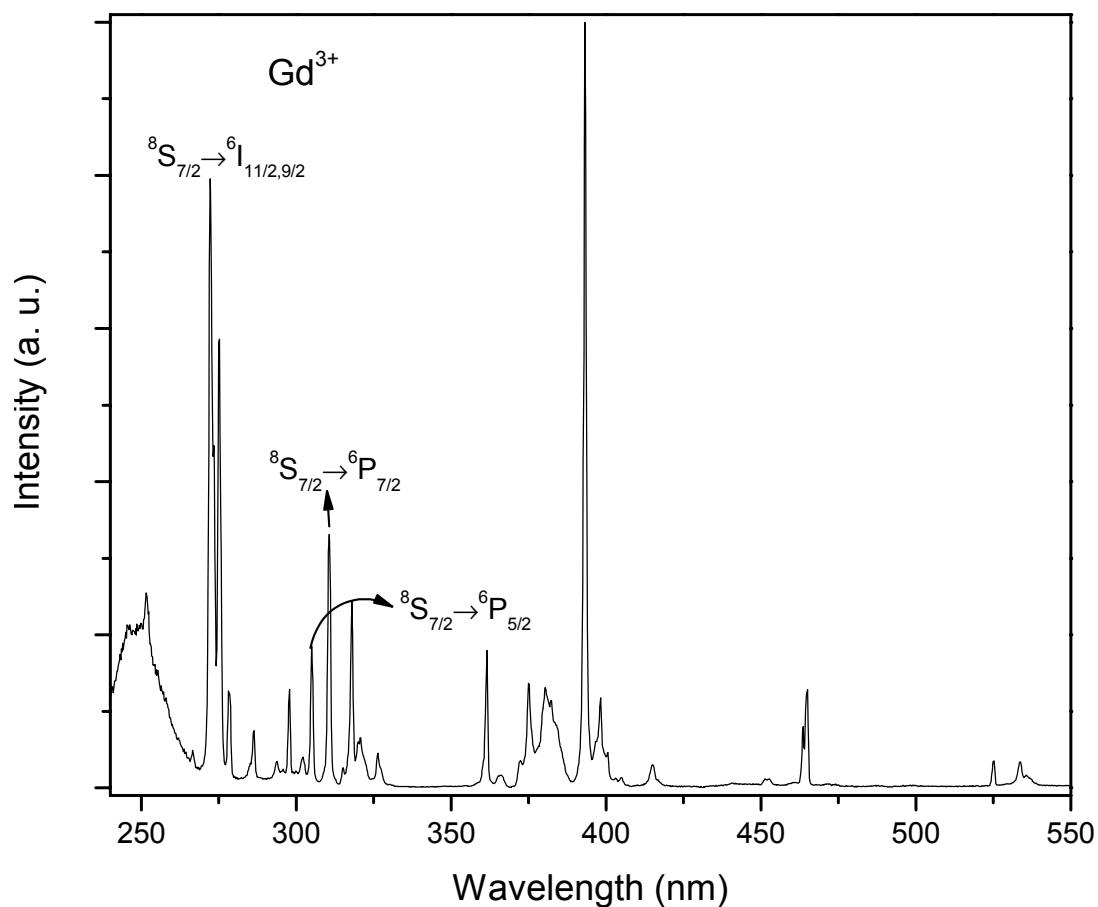

**Figure S25** - Excitation spectrum of  $[(Gd_{0.95}Eu_{0.05})(H_2cmp)(H_2O)]$  (**12**) recorded at room-temperature by monitoring the  $Eu^{3+}$  emission at 616.5 nm.

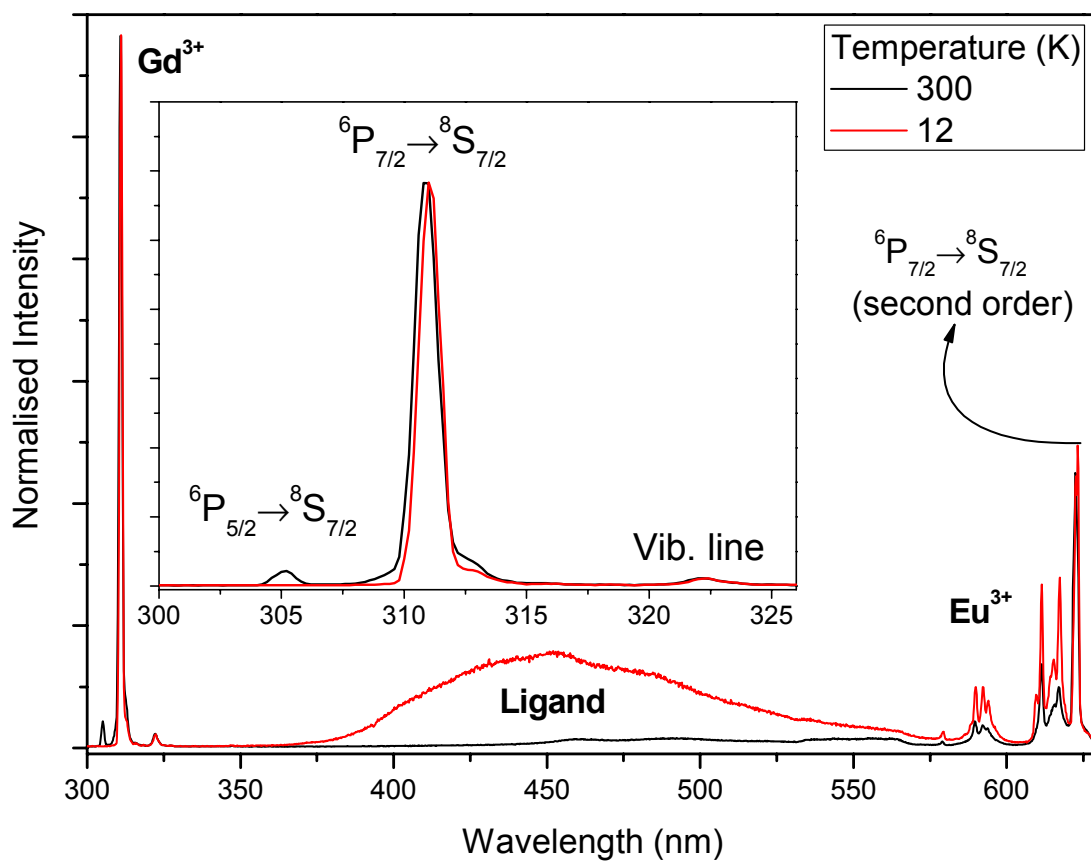

**Figure S26** - Time-resolved emission spectra of  $[(\text{Gd}_{0.95}\text{Eu}_{0.05})(\text{H}_2\text{cmp})(\text{H}_2\text{O})]$  (12), with an initial delay of 0.05 ms, at 300 (black line) and 12 K (red line) excited at 272 nm. The inset shows an expansion of the Gd<sup>3+</sup> emission. Please note: the spectra were not corrected for the spectral response of the monochromators and the detector.

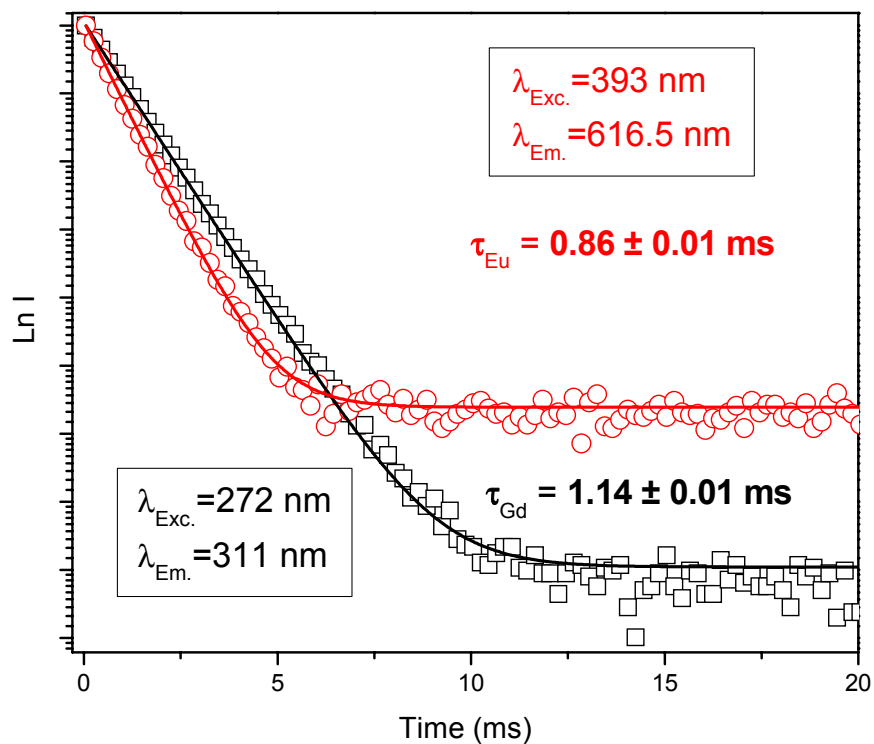

**Figure S27** - Decay curves of [(Gd<sub>0.95</sub>Eu<sub>0.05</sub>)(H<sub>2</sub>cmp)(H<sub>2</sub>O)] (**12**) recorded at room-temperature for the <sup>5</sup>D<sub>0</sub> state of Eu<sup>3+</sup> (**red**) and the <sup>6</sup>P<sub>7/2</sub> state of Gd<sup>3+</sup> (**black**) emission.

## 5. Thermograms

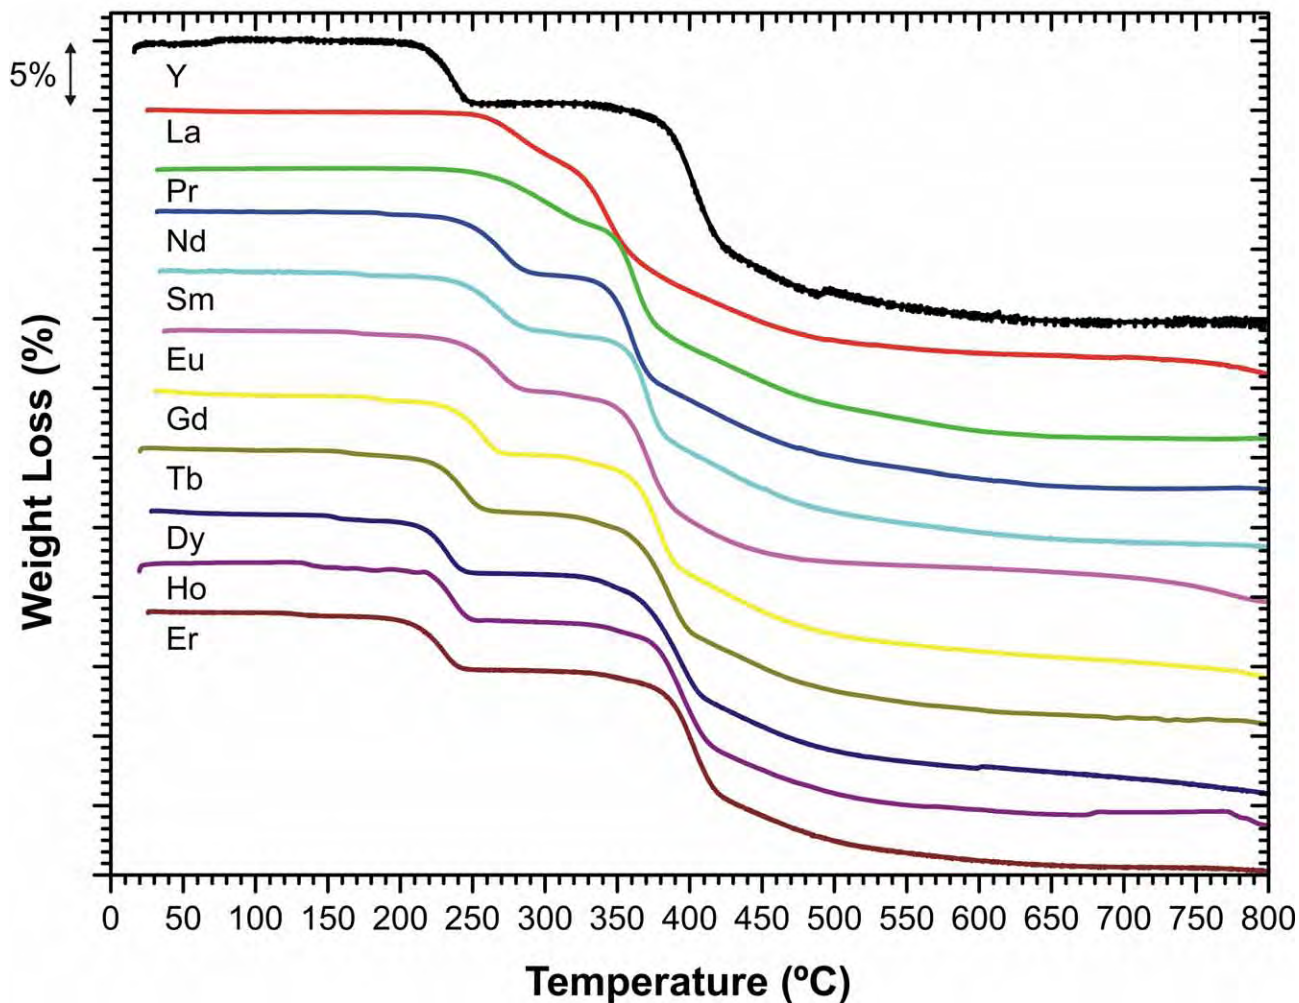

**Figure S28** - Thermograms for  $[\text{RE}(\text{H}_2\text{cmp})(\text{H}_2\text{O})]$  [where  $\text{RE}^{3+} = \text{Y}^{3+}$  (1),  $\text{La}^{3+}$  (2),  $\text{Pr}^{3+}$  (3),  $\text{Nd}^{3+}$  (4),  $\text{Sm}^{3+}$  (5),  $\text{Eu}^{3+}$  (6),  $\text{Gd}^{3+}$  (7),  $\text{Tb}^{3+}$  (8),  $\text{Dy}^{3+}$  (9),  $\text{Ho}^{3+}$  (10) and  $\text{Er}^{3+}$  (11)].

## 6. Vibrational Spectroscopy

### 6.1 - FT-IR

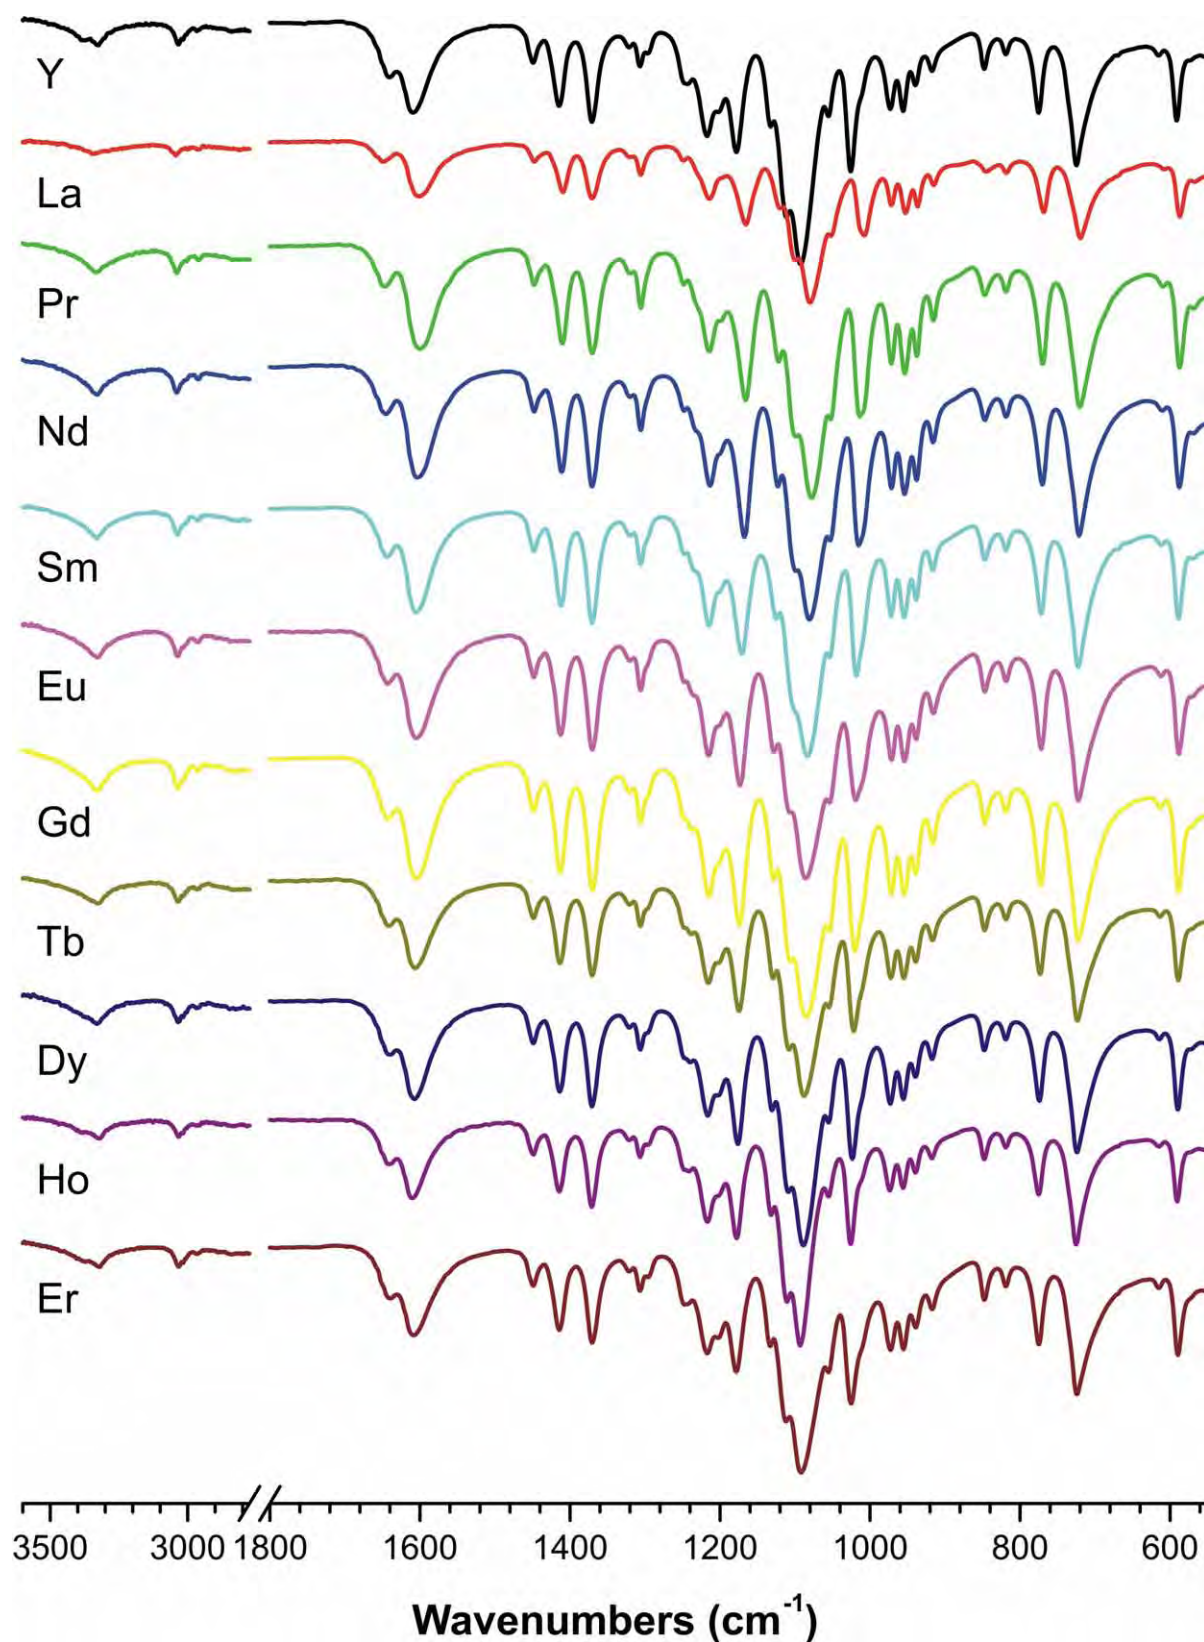

**Figure S29** - ATR-FTIR for  $[\text{RE}(\text{H}_2\text{cmp})(\text{H}_2\text{O})]$  [where RE<sup>3+</sup> = Y<sup>3+</sup> (1), La<sup>3+</sup> (2), Pr<sup>3+</sup> (3), Nd<sup>3+</sup> (4), Sm<sup>3+</sup> (5), Eu<sup>3+</sup> (6), Gd<sup>3+</sup> (7), Tb<sup>3+</sup> (8), Dy<sup>3+</sup> (9), Ho<sup>3+</sup> (10) and Er<sup>3+</sup> (11)].



## 6.2 - FT-Raman

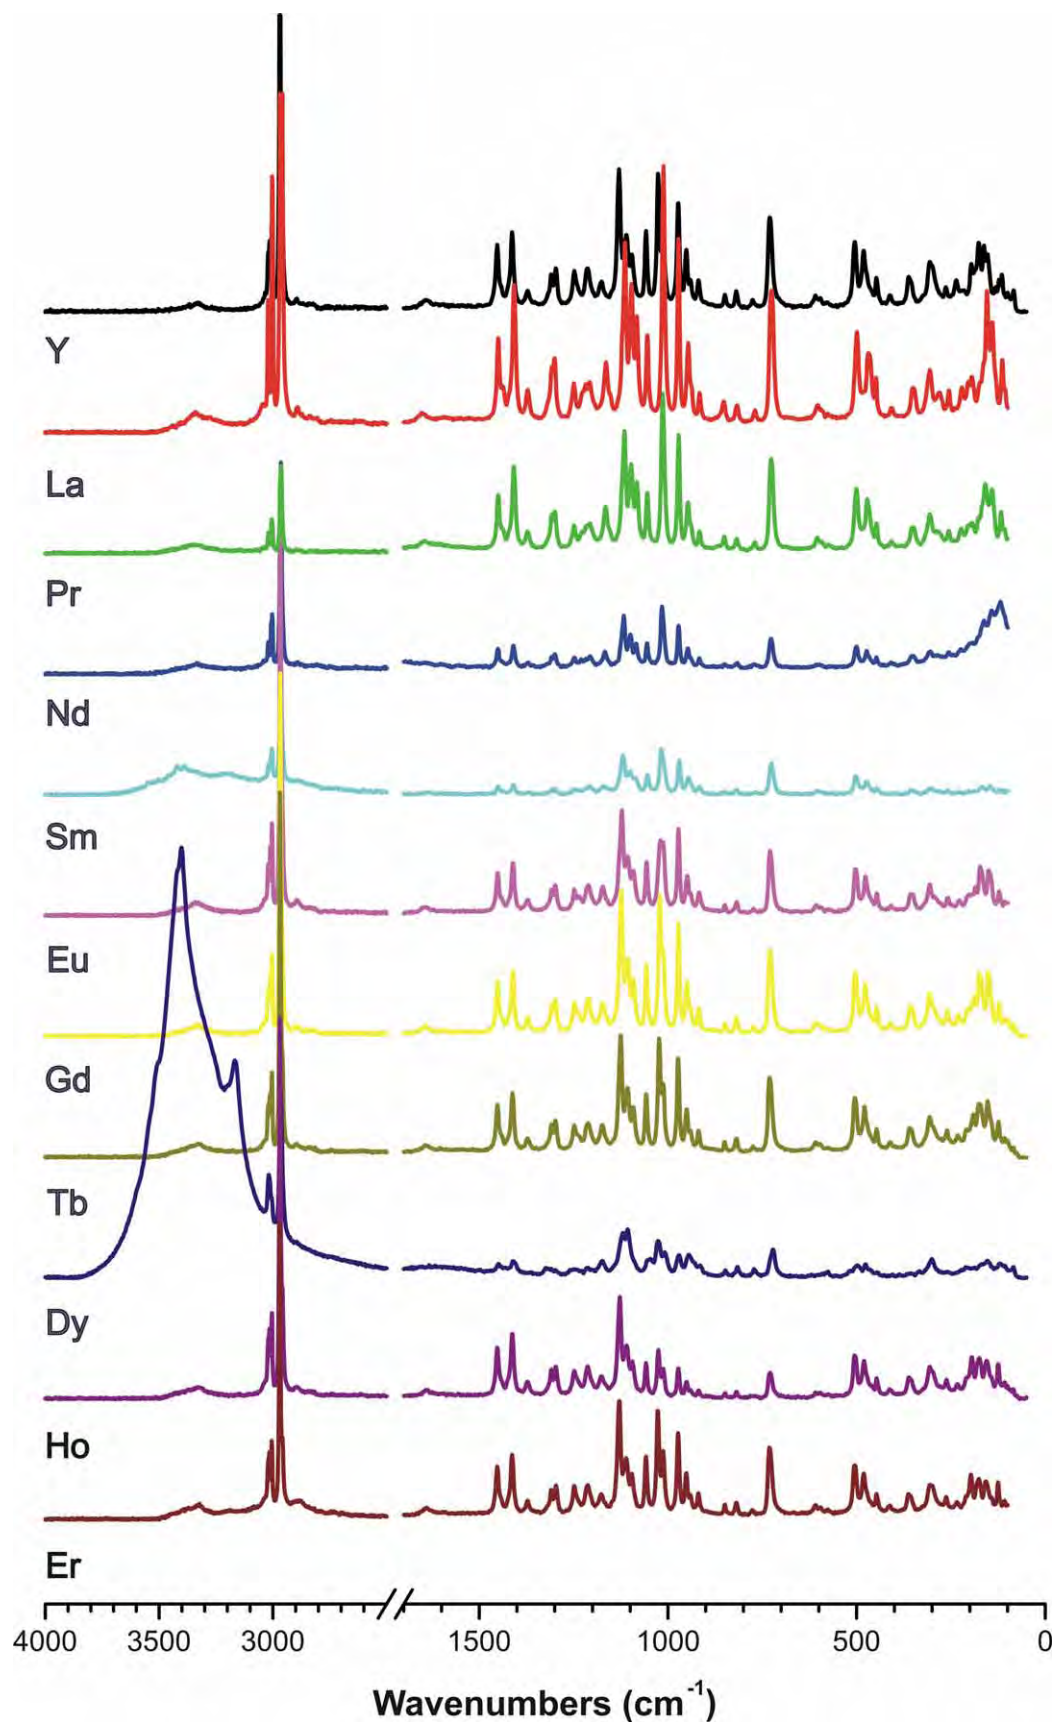

**Figure S30** - FT-Raman for [RE(H<sub>2</sub>cmp)(H<sub>2</sub>O)] [where RE<sup>3+</sup> = Y<sup>3+</sup> (1), La<sup>3+</sup> (2), Pr<sup>3+</sup> (3), Nd<sup>3+</sup> (4), Sm<sup>3+</sup> (5), Eu<sup>3+</sup> (6), Gd<sup>3+</sup> (7), Tb<sup>3+</sup> (8), Dy<sup>3+</sup> (9), Ho<sup>3+</sup> (10) and Er<sup>3+</sup> (11)].

## 7. References

1. A. Boultif and D. Louer, *J. Appl. Crystallogr.*, 1991, **24**, 987-993.
2. D. Louer, in *Automatic Indexing: Procedures and Applications, Accuracy in Powder Diffraction II*, Gaithersburg, MD, USA, 1992, pp. pp. 92-104.
